# Supplementary material for: Updating standards for reporting diagnostic accuracy: the development of STARD 2015
Source: Springer Nature journal article supplement (doi:10.1186/s41073-016-0014-7), 2016-06-06
Supplement: MOESM5 [file 41073_2016_14_MOESM5_ESM.pdf]

Welcome to the STARD update piloting survey.

**STARD is a reporting guideline focusing on diagnostic accuracy studies.**

**It was first published in 2003 and endorsed by more than 200 journals.**

**The STARD Group is currently updating the checklist.**

**In this survey we would like to collect your feedback on this draft of the updated STARD checklist and the explanatory document that will constitute the flipside of the checklist.**

### **Background information.**

The results from this survey will be anonymized but you can leave your name if you like:

What is your main professional activity?

- Clinical radiologist
- Medical laboratory scientist
- Physician
- Biomedical researcher
- Journal editor
- Other

If other, please specify:

Were you ever co-author of a diagnostic accuracy study report?

- Yes
- No

STARD explanatory document

1. From this explanatory document, is the aim of STARD clear to you?

- Yes
- No
- No opinion

2. Do you feel that the information about STARD presented in this explanatory document is sufficient?

- Yes
- No
- No opinion

3. Do you feel that the terminology used in this explanatory document is easy to understand?

- Yes
- No
- No opinion

If "No" to any question, please elaborate:

## STARD checklist: general comments

1. Are you satisfied with the layout of the checklist?

- Yes
- No
- No opinion

2. Are you satisfied with the outline of the checklist (headings and subheadings)?

- Yes
- No
- No opinion

3. Do you feel that the terminology used in the checklist is easy to understand?

Yes

No

No opinion

If "No" to any question, please elaborate:

### STARD checklist: item-specific comments

1. Did you find any item(s) particularly difficult to understand?

Yes

No

No opinion

Please elaborate, if any items were difficult to you:

2. Do you feel that anything important is missing from the checklist?

Yes

No

No opinion

Please elaborate, if you feel anything important is missing:

[Open comments page.](#)

Please feel free to provide any additional comment:
